1     **Proximity sensors reveal social information transfer in maternity colonies**  
2                                   **of Greater noctule bats**

3  
4  
5  
6

7     Simon Ripperger\*<sup>1,2</sup>, Linus Günther<sup>1</sup>, Hanna Wieser<sup>1</sup>, Niklas Duda<sup>3</sup>, Martin Hierold<sup>3</sup>, Björn  
8                                   Cassens<sup>4</sup>, Rüdiger Kapitzka<sup>4</sup>, Alexander Kölpin<sup>5</sup>, Frieder Mayer<sup>1,6</sup>

9                   <sup>1</sup>Museum für Naturkunde, Leibniz-Institute for Evolution and Biodiversity Science,  
10                                   Invalidenstraße 43, 10115 Berlin, Germany

11     <sup>2</sup>Smithsonian Tropical Research Institute, PO Box 0843-03092, Balboa, Ancón, Republic of  
12                                   Panama

13     <sup>3</sup>Institute for Electronics Engineering, Friedrich-Alexander University of Erlangen-Nürnberg,  
14                                   Wetterkreuz 15, 91058 Erlangen-Tennenlohe, Germany

15     <sup>4</sup>Carl-Friedrich-Gauß-Fakultät, Technische Universität Braunschweig, Mühlenpfordtstraße  
16                                   23, 38106 Braunschweig

17     <sup>5</sup>Chair for Electronics and Sensor Systems, Brandenburg University of Technology, Siemens-  
18                                   Halske-Ring 14, 03046 Cottbus, Germany

19     <sup>6</sup>Berlin-Brandenburg Institute of Advanced Biodiversity Research, Altensteinstr. 34, 14195  
20                                   Berlin, Germany

21                                   \* Corresponding author: [simon.ripperger@gmail.com](mailto:simon.ripperger@gmail.com)

22  
23  
24  
25

## 26 **Summary**

- 27 1. Bats are a highly gregarious taxon suggesting that social information should be readily  
28 available for making decision. Social information transfer in maternity colonies might  
29 be a particularly efficient mechanism for naïve pups to acquire information on  
30 resources from informed adults. However, such behaviour is difficult to study in the  
31 wild, in particular in elusive and small-bodied animals such as bats.
- 32 2. The goal of this study was to investigate the role of social information in acquiring  
33 access to two types of resources, which are crucial in the life of a juvenile bat: suitable  
34 roosting sites and fruitful feeding grounds. We hypothesized that fledging offspring  
35 will make use of social information by following informed members of the social  
36 groups to unknown roosts or foraging sites.
- 37 3. In the present study we applied for the first time the newly developed miniaturized  
38 proximity sensor system ‘BATS’, a fully automated system for documenting  
39 associations among individual bats both while roosting and while on the wing. We  
40 quantified associations among juveniles and other group member while switching  
41 roosts and during foraging.
- 42 4. We found clear evidence for information transfer while switching roosts, mainly  
43 among juveniles and their genetically identified mothers. Anecdotal observations  
44 suggest intentional guidance behaviour by mothers, indicated by repeated commuting  
45 flights among the pup and the target roost. Infrequent, short meetings with colony  
46 members other than the mother indicate local enhancement at foraging sites, but no  
47 intentional information transfer.
- 48 5. Our study illustrates how advances in technology enable researchers to solve long-  
49 standing puzzles. Miniaturized proximity sensors facilitate the automated collection of  
50 continuous data sets and represent an ideal tool to gain novel insights into the  
51 sociobiology of elusive and small-bodied species.

52

## 53 **Key-words**

54 Evolved signals, foraging, information centre hypothesis, local enhancement, maternal care,  
55 maternal guidance, *Nyctalus noctula*, roost switching

56

## 57 **Introduction**

58 The early development is a critical phase for an animal since it paves the way for later life by  
59 affecting survival rate and overall fitness. It has been shown for several species that limited  
60 access to food resources within the first weeks after birth has a negative impact on  
61 reproductive success (Lindström 1999; Lummaa & Clutton-Brock 2002). However, a central  
62 question is: how do offspring get access to resources in early life once they start to become  
63 independent? Behaviours related to foraging might be genetically predefined, which is the  
64 case in many invertebrates but also in vertebrate taxa (van Schaik *et al.* 2017). Over time,  
65 ‘personal information’ which is acquired by direct interaction with the environment (Dall *et*  
66 *al.* 2005) or individual learning by trial and error augment an individual’s capabilities (van  
67 Schaik *et al.* 2017). If animals are born and raised in presence of their parents or other  
68 conspecifics, information may be socially acquired (Galef Jr & Giraldeau 2001). Adopting  
69 information from group members may be more efficient and less costly than individual  
70 learning and contributes to an individual’s behavioural flexibility under changing conditions  
71 (Dall *et al.* 2005; van Schaik *et al.* 2017).

72 Information obtained within colonies or groups of conspecifics enables better decisions in  
73 various contexts such as predator avoidance, reduction of parasitism, habitat choice and  
74 foraging (Evans, Votier & Dall 2016). The mechanisms of acquiring social information may  
75 vary widely in complexity. Individuals may use ‘inadvertent social information’, which is  
76 generated by social cues of conspecifics, i.e., eating may inform about the location of food or

77 fleeing about the presence of a predator (Dall *et al.* 2005). Such public information is created  
78 non-deliberately and in group-living animals it may be difficult to hide certain information,  
79 e.g., on foraging success. This might particularly apply for breeding colonies, where parents  
80 must return to their young and may inadvertently inform others on foraging success via, e.g.,  
81 time of arrival or fatness (Evans, Votier & Dall 2016). If information is provided deliberately,  
82 ‘evolved signals’ are used to actively exchange information (Dall *et al.* 2005). Black-capped  
83 chickadees, e.g., broadcast alarm calls which contain information on the presence and even  
84 the size of a predator (Templeton, Greene & Davis 2005) and honey bees use the waggle  
85 dance to inform conspecifics on the location of a food source (Leadbeater & Chittka 2007).  
86 The ready availability of information at communal roosts gave rise to the Information Center  
87 Hypothesis (ICH), which states that such assemblages primarily evolved for the efficient  
88 exploitation of unevenly distributed food sources (Ward & Zahavi 1973). According to the  
89 ICH colony members must assess the success of returning foragers, which are later followed  
90 to food patches. However, information can also be generated right at the resource, a  
91 mechanism termed ‘local enhancement’. Black-browed albatrosses, e.g., indirectly detect food  
92 patches by approaching aggregations of foraging predators over sea (Grünbaum & Veit 2003).  
93 Both advertent and inadvertent information can be used by juveniles to find food. Juvenile  
94 rats prefer feeding sites where adults are present and scent marks and trails of adults cause  
95 juveniles to explore such sites (reviewed by Galef Jr and Giraldeau (2001)). Juveniles, since  
96 they are naïve, seem to particularly rely on acquiring social information from more  
97 experienced individuals of the group like their parents (termed ‘vertical transmission’) or  
98 other adults (‘oblique transmission’) (van Schaik *et al.* 2017).  
99 Bats are an ideal taxon to study the mechanisms of social information use in groups since the  
100 vast majority of species is gregarious and long-lived (Wilkinson & Boughman 1999; Kerth  
101 2008; Smith, Lacey & Hayes 2017). However, there is surprisingly little known on whether  
102 and how juveniles benefit from social information provided by group members. An interesting

103 case of information transfer across generations is reported for greater sac-winged bats. Here,  
104 vocal development of pups is influenced by imitation of territorial songs of harem males and  
105 leads to a group signature which is independent of relatedness (Knörnschild *et al.* 2010;  
106 Eckenweber & Knörnschild 2013). When it comes to learning where to roost and where to  
107 forage, knowledge on juveniles becomes scarce and existing literature focusses on horizontal  
108 information transfer among adult peers. Empirical studies in the wild demonstrated that  
109 several insectivorous species are attracted to feeding buzzes by conspecifics which may be  
110 used as a signal of foraging success (Gillam 2007; Dechmann *et al.* 2009; Cvikel *et al.* 2015).  
111 Female greater spear-nosed bats coordinate their foraging bouts at the day roost by screech  
112 calls (Wilkinson & Boughman 1998). However, neither local enhancement nor recruitment at  
113 the roost has been demonstrated in foraging juveniles, so far. Spatial association among home  
114 ranges of mothers and offspring in at least three species and simultaneous feeding of mother-  
115 pup pairs in vampire bats suggest that vertical information transfer, possibly in form of  
116 following behaviour, might provide juveniles with insights on where to forage, but this  
117 mechanism has yet has to be demonstrated (Wilkinson 1995; Schnitzler, Moss & Denzinger  
118 2003).

119 Similarly little is known on how juveniles learn about the location of suitable roosts and the  
120 few existing studies only involved adults. In Greater noctule bats local enhancement by  
121 inadvertent acoustic cues significantly reduces the time required to locate a roost both in  
122 captive and in wild experiments (Ruczyński, Kalko & Siemers 2007; Furmankiewicz *et al.*  
123 2011). Kerth and Reckardt (2003) tracked nightly roost switching behaviour in Bechstein's  
124 bats and assumed that recruitment of naïve by informed individuals already started at the day  
125 roost, but could not unequivocally prove it. An exclusion experiment by Wilkinson (1992)  
126 demonstrated that juvenile bats are able of relocating at a new roost with their mothers and the  
127 author concluded that following behaviour is the only plausible explanation. One of the still  
128 standing mysteries in bat ecology is how juveniles of temperate species locate swarming or

129 hibernation sites, which are often long distances from where they are born and reared. It has  
130 been hypothesized that mothers guide their offspring (Sachteleben 1991), but so far nobody  
131 was able to track such guidance behaviour. These examples emphasize that there are plenty of  
132 indications on following and guidance behaviour in juvenile bats, but so far technological  
133 limitations prevented the final proof.

134 While emerging technologies have revolutionized the field of bio-logging and in turn our  
135 understanding of behaviour of wild animals during the past decades, studies on small-bodied  
136 vertebrates still lag behind due to the scarcity of fully automated lightweight devices (Kays *et*  
137 *al.* 2015). Proximity loggers represent a powerful tool for the study of information transfer  
138 (Rutz *et al.* 2015; St Clair *et al.* 2015), but studies making use of such devices are generally  
139 rare and the loggers used in the aforementioned studies are by far too heavy for tagging  
140 medium-sized bats. Smaller tag versions of acceptable weight, however, show dramatically  
141 reduced runtimes of less than 24 h (Levin *et al.* 2015). In the present study we used the newly  
142 developed miniaturized proximity sensor system ‘BATS’, a fully automated system for  
143 documenting associations among individuals at a tag weight of one to two gram and runtimes  
144 of at least one to two weeks (Duda, Weigel & Koelpin 2018). Our developments enable us to  
145 study interactions among tagged bats both while roosting and while on the wing. Here we  
146 report on the first extensive study to apply our system and proximity sensors to free-ranging  
147 bats, in general.

148 The goal of this study was to investigate the use of social information in acquiring access to  
149 two types of resources, which are crucial in the life of a juvenile bat: suitable roosting sites  
150 and fruitful feeding grounds. We hypothesized that fledging offspring will make use of social  
151 information by following either the mother or other informed members of the social groups to  
152 unknown roosts or foraging sites. If juveniles use social information when switching roosts,  
153 we expect that the successfully switching juvenile will be associated with at least one  
154 individual of the group shortly before and shortly after leaving the current roost and shortly

155 before and shortly after arriving at the new roost. If social information is used for finding  
156 foraging grounds, we would expect juveniles to be associated with at least one roosting  
157 partner shortly before and shortly after starting the bout, during several minutes after starting  
158 while commuting to the foraging ground, and possibly, but not necessarily when returning to  
159 the roost. The BATS-tracking system enabled us to classify and quantify the aforementioned  
160 events.

161

## 162 **2. Materials and methods**

### 163 2.1 Field site and study species

164 This study was conducted in “Königsheide Forst”, a mixed forest in Berlin, Germany, from  
165 June to August 2016 and 2017, respectively. The study site comprises ample of roosting  
166 opportunities for bats such as natural tree holes and roughly 130 bat boxes. During this time  
167 of the year females of the common noctule bat (*Nyctalus noctula*) form temporary groups, so  
168 called maternity colonies, to jointly give birth and rear their young. Mothers give birth to one  
169 or two offspring and individuals of a maternity colony frequently switch roosts, but usually  
170 stay within the area of the nursing colony. Moving among roosts may involve a change in  
171 group composition. However, strong, non-random inter-individual bonds have been observed  
172 in captive studies as well as a certain degree of maternal care such as allogrooming of  
173 offspring (Kleiman 1969; Kozhurina 1993).

174 The ideal opportunity to observe information transfer in maternity colonies should be the  
175 moment when the offspring start to fledge in order to track their behaviour during the first  
176 nights of independent flight. Therefore, we daily monitored the bat boxes, including checks  
177 after sunset when adults and already flying juvenile had emerged from the roost. We aimed at  
178 tagging the majority of a social group including juveniles, which have started fledging only  
179 recently or which not fledged at all, yet. We therefore prepared to capture on the following

180 day when around a third of the offspring were still inside the roost while the rest of colony  
181 (including already fledged youngsters) was foraging.

182

## 183 2.2 Sample collection, molecular analysis and identification of mother pup pairs

184 In 2016 we captured a social group from a single bat box while in 2017 bats were caught from  
185 two different bat boxes which were roughly 300m apart. Bats were kept in cotton cloth bags  
186 until they were weighted, sexed and the forearm was measured using a calliper. If the  
187 epiphyseal gaps were closed and the phalangeal–metacarpal joints were knobby, individuals  
188 were considered adult (Brunet-Rossinni & Wilkinson 2009). We collected tissue samples with  
189 a biopsy punch (Ø 4 mm, Stiefel Laboratorium GmbH, Offenbach, Germany) and preserved  
190 them in 80% ethanol. In the lab we used the salt–chloroform procedure (Miller, Dykes &  
191 Polesky 1988) modified by Heckel *et al.* (1999) for DNA isolation.

192 We used the DNA Analyser 4300 and the SAGA<sup>GT</sup> allele scoring software (both: LI-COR  
193 Biosciences, Lincoln, NE, USA) to genotype a total of 75 individuals (n<sub>f</sub>= 33 adult  
194 females, n<sub>j</sub>=42 juveniles) at 9 polymorphic microsatellite loci. We used the loci P11, P217,  
195 P219 and P223 which were isolated from the focus species *Nyctalus noctula* (Mayer,  
196 Schlötterer & Tautz 2000). Nleis3 and Nleis4 were isolated from the closely related *Nyctalus*  
197 *leisleri* (Boston, Montgomery & Prodöhl 2009) and G6-Mluc, G31-Mluc, H23-Mluc and  
198 H29-Mluc have originally been isolated from *Myotis myotis* (Castella & Ruedi 2000), but  
199 were subsequently modified for cross-species utility in vespertilionid species (Jan *et al.* 2012).  
200 To calculate allele frequencies all adult individuals from both years (n=33) were used. All  
201 individuals were genotyped at least at eight loci, and genotypes were 99.7% complete. See  
202 Table S1 in supporting information for allele numbers per locus, results of Hardy–Weinberg  
203 tests, null allele frequencies, and non-exclusion probabilities for the nine microsatellite  
204 markers.



205 Parentage analyses were performed with CERVUS v. 3.0 (Kalinowski, Taper & Marshall  
206 2007) separately for the social groups caught in 2016 and 2017, respectively, since our  
207 objective was to identify mother-pup pairs within year, not across years. The 2016 data set  
208 comprised 20 juveniles and 13 adult females (candidate mothers), while 22 juveniles and 24  
209 candidate mothers were used for 2017. Four of the 24 adult females in 2017 were recaptures  
210 that were already caught in 2016 as juvenile (n=1) and adults (n=3).

211 Simulations were run with 100 000 cycles, a proportion of 80% sampled candidate mothers,  
212 an estimated genotyping error of 2%, and for two confidence levels (80% and 95%). One  
213 mismatch per mother-offspring dyad was accepted to account for genotyping errors or  
214 mutations. A mother could be assigned to 40 (2016: n=18; 2017: n=22) of the 42 analysed  
215 juveniles. Thirty-three mother-pup pairs were assigned at 95 % confidence with no mismatch,  
216 six at 95 % confidence with one mismatch and only one with 80 % confidence and one  
217 mismatch.

218

### 219 2.3 Automated encounter detection among tagged bats

220 Our team developed a tracking system for direct encounter detection, which bases on wireless  
221 sensor network technology for field strength related distance estimation between individuals.  
222 The system is fully automated including remote data download and does not require  
223 recapturing tagged animals thus reducing disturbance of the animals to a minimum. The  
224 centrepiece of the tracking hardware is the animal-borne mobile node, in the following  
225 referred to as 'proximity sensor'. Once deployed, a wake-up receiver on the proximity sensor  
226 permanently scans its surroundings for signals of other proximity sensors, which are  
227 constantly broadcasted every two seconds. This operation mode is independent of any further  
228 infrastructure. Whenever one or more tracking sensors are within reception range of ca. 10 m  
229 maximum distance (Ripperger *et al.* 2016), a so called 'meeting' is created. As soon as no  
230 signal has been received by the respective meeting partner for five sending intervals

231 (corresponding to 10 seconds), the meeting is closed and stored to on-board memory along  
232 with the ID of the meeting partner, a timestamp, total meeting duration, and a maximum  
233 signal strength indicator (RSSI) of the meeting. The signal, which is broadcasted every 2 s, is  
234 simultaneously used as an indicator of presence at a site of interest, e.g. a roost, when the  
235 signal is received by a stationary node, in the following referred to as ‘base stations’. We  
236 positioned base stations near potential roosts to detect presence of individual tagged bats  
237 inside a particular bat box or tree hole and we therefore termed a bat signal which are picked  
238 up by base stations ‘presence signal’. Base stations also provide remote data download, while  
239 all downloaded data is locally stored and can be accessed by the user. In 2016 the system  
240 could operate a maximum of 30 IDs at a time, while in 2017 the maximum number of  
241 observable individuals has been increased to 60. In the following we give a brief overview of  
242 the hardware components and the functionality of the system. For an elaborate, in-depth  
243 description of the software see Cassens *et al.* (2017) and for hardware see Duda, Weigel and  
244 Koelpin (2018).

245

246 2.3.1 Proximity sensors: We used a refined version of miniaturized proximity sensors, which  
247 has been described and tested in free-ranging bats first in Ripperger *et al.* (2016). The  
248 proximity sensor comprises a System-on-Chip (SoC) for communication control and on-board  
249 data processing, a transceiver which enables communication in the 868MHz frequency band  
250 with other proximity sensors or base stations and a wake-up-receiver which activates full  
251 system functionality from an energy-saving low-power mode whenever communication  
252 partners are in range. A lithium-polymer battery powers the mobile node. We built two  
253 versions of the proximity sensor that differ in weight since adult females and offspring of  
254 noctule bats varied considerably in body weight. The low-weight version for tagging offspring  
255 was equipped with a 15 mAh battery and was housed in the fingertip of a nitrile lab glove.  
256 The heavier version for adult females was equipped with either two 15 mAh battery of a

257 single 24mAh batteries and housed in a 3D-printed plastic case ensuring longer runtime. The  
258 different proximity sensor versions resulted in a total weight of 1.1 to 1.9 g including battery  
259 and housing.

260

### 261 2.3.2 Base stations and data access

262 The base station contains a receiver for the reception of presence signals and transmitted data.  
263 Presence signals and downloaded data are stored by a Raspberry Pi (Raspberry Pi Foundation,  
264 Cambridge, UK) to a SD card along with the ID of the transmitting proximity sensor and the  
265 receiving base station, respectively, and a timestamp which is provided by a GPS unit. At the  
266 same time the Raspberry Pi hosts a WiFi hotspot allowing the user remote data access. The  
267 data is then stored in a MySQL database.

268

### 269 2.4 Tagging and data collection

270 On July 15<sup>th</sup> 2016 we tagged in total 26 individuals, 10 juveniles and 16 adult females, from a  
271 single bat box. On July 18<sup>th</sup> 2017 we tagged in total 34 individuals, 19 juveniles and 15 adult  
272 females from two bat boxes. This adds up to a total of 60 tracked bats, 29 of which were  
273 juveniles and 31 were adult females. According to individual body weight we used different  
274 versions of the proximity sensors. Bodyweight ranged from 17g to 25g for juveniles and  
275 averaged at 21.26g +/- 2.04, while adult body weight ranged from 23.5g to 35g at an average  
276 of 27.73g +/- 2.27. Individual tag-to-body weight ratios ranged from 4.4% to 7% for juveniles  
277 and from 4.2% to 8% in adults, which is well within the recommendations for short-term  
278 biologging studies in bats (Amelon *et al.* 2009; O'Mara, Wikelski & Dechmann 2014).  
279 Proximity sensors were glued to the fur on the back of the bats using surgical cement (Perma-  
280 Type, Plainville, CT, USA) and drops off when the cement loses its tackiness.

281 Data collected during the first night after the tagging event was discarded to account for  
282 potential behavioural changes right after tagging and actual data collection started the night

283 after in order to allow the bats to get used to the tag. In 2016 data collection lasted until July  
284 28<sup>th</sup> (12 days) and in 2017 until August 8<sup>th</sup> (20 days). We installed three respectively five base  
285 stations in 2016 and 2017 at day roosts to download data and to receive presence signals for  
286 individual bats. Whenever bats switched to unknown roosts we used a handheld 868 MHz  
287 panel antenna (HSP-868C, WiMo, Herxheim, Germany) connected to a base station to  
288 localize the unknown roost and relocate base station.

289

## 290 2.5 Analysis of tracking data

291 We used the library RMySQL in R (James & DebRoy 2012) to access the data, which were  
292 managed in HeidiSQL, a Windows client for MariaDB. In a first step we plotted and visually  
293 explored presence signals and meetings received at base stations to define foraging bouts and  
294 roost switching events, respectively, for all individual juveniles (see Fig. 2a-c for examples).  
295 To evaluate potential information transfer we queried the meeting database for events, which  
296 matched the timestamp of foraging bouts or roost switches, respectively. If information  
297 transfer would play a role during foraging or roost switching, we would expect to find  
298 meetings among offspring and other group members associated with these events. In detail,  
299 we proceeded as follows.

300

### 301 2.5.1 Evaluation of information transfer during roost switching

302 We defined a roost switch as an event during which an individual changes its roost and  
303 potentially its roosting partners without prolonged absence times which may indicate  
304 foraging. A roost switch can be detected if a bat switches between two roosts which are both  
305 equipped with a base station receiving presence signals (Fig. 2b). If at least one roost is  
306 equipped with a base station, presence signals can be used to determine departure time or  
307 arrival, respectively. If the unmonitored roost is occupied by other tagged bats (indicated by  
308 reciprocal, stable meetings) we can at least unequivocally classify this event as a roost switch

309 (Fig. 2c). However, we cannot determine the time of arrival respectively departure at the  
310 unmonitored roost because bats may leave jointly. If juveniles use social information when  
311 switching roosts, we expect that the switching juvenile will be associated with at least one  
312 individual of the group shortly before and shortly after leaving the current roost or arriving at  
313 the new roost. To this end we define the moment of departing from or arriving at a monitored  
314 roost, respectively, when the steady reception of signal beacons at a base station gets cut off  
315 or starts. We subsequently queried the meeting database for meetings which are active or  
316 which started within 60s before and within 60s after the moment of leaving or arriving at a  
317 roost.

318

#### 319 2.5.2 Evaluation of information transfer during foraging bouts

320 We defined a foraging bout as an event where an individual starts from a known roost, returns  
321 to the same roost and does not visit other monitored roosts or roosts with tagged bats  
322 (indicated by stable, lasting meetings) in between (Fig. 2a). We chose these strict rules to  
323 ensure that the events we are looking at relate to foraging and do not overlap with roost  
324 switching events. If social information would play a role in locating foraging grounds we  
325 would expect a juvenile to associate with at least one roosting partner upon starting the bout,  
326 during several minutes after departure while commuting to the foraging ground, and possibly,  
327 but not necessarily when returning to the roost. As described above we equally defined the  
328 start and the end of the foraging bout as the end and the start of the steady reception of the  
329 presence signal, respectively. We then queried all meetings which were ongoing or started  
330 within 60s before and within 60s after starting a foraging bout and returning, respectively. In  
331 addition, we queried all meetings which originated during the entire foraging bout.

332

#### 333 2.5.3 Statistical testing

334 We used a Mantel-Test to test whether social information used by juveniles is obtained by  
335 their mothers in the first place or by any roosting partner. To this end we created a binary  
336 matrix containing “1” for dyads which have been associated while roost switching and “0” for  
337 dyads which have never been observed switching communally. Accordingly, foraging  
338 associations were transformed into a binary matrix. For testing the effect of maternity we  
339 created a second binary correlation matrix which listed the genetically determined identity of  
340 mother-pup pairs as “1”, while all other dyads were marked “0”. We tested the years 2016 and  
341 2017 separately and ran Mantel tests in the library “ade4” version 1.7-11 in RStudio 1.1.453  
342 using Monte-Carlo permutation tests with 9999 replicates (Dray & Dufour 2007; R  
343 Developing Core Team 2015).

344

### 345 **3. Results**

#### 346 3.1 Genetic analyses

347 Mother and juvenile bats were caught in day roosts at the time of weaning. In 24 determined  
348 mother-pup pairs, both individuals were tagged with proximity sensors (2016: n=9, all  
349 assigned at 95 % confidence with no mismatch; 2017: n=15, 12 pairs assigned at 95 %  
350 confidence with no and three pairs at 95 % confidence with one mismatch). These 24 mother-  
351 pup pairs generated the data for the following section.

#### 352 3.2 Tracking results

353 In 2016 we received a total of 561,795 presence signals and 13,292 meetings from 23  
354 individual bats and in 2017 we received 2,667,409 localization signals and 53,391 meetings  
355 from 33 individual bats. One individual in 2016 and three individuals in 2017 did not get in  
356 contact with base stations. These four individuals may have left the study area between  
357 tagging and the following night.

##### 358 3.2.1 Evaluation of joint roost switching events

359 To evaluate information transfer on roosts we screened the data set for joint departures from  
360 and joint arrivals at roosts for all tagged juveniles. In 2016 we observed ten events of seven  
361 individual juveniles being associated with another individual while switching among two  
362 roosts. In all except one event the associated bats arrived together at a new roost, even though  
363 successful switching took several approaches in two cases and temporary roosts may be used  
364 in between (Table 1, Fig. 3). In six cases both roosts have been monitored by a base station, in  
365 two cases the juveniles left a monitored roost and switched to a roost where other tagged bats  
366 have been roosting and in the remaining two cases the juveniles switched from a monitored  
367 roost to an unknown roost where no other tagged bats were present, except the one which  
368 accompanied the juvenile during switching. In all 10 cases the juvenile was in company of its  
369 identified mother and no other tagged bat.

370 In 2017 we observed six events where 5 individual juveniles switched roosts in company.  
371 Twice, the juvenile switched among two monitored roosts and four times among one  
372 monitored and an unmonitored site. Twice, the juvenile was associated with its identified  
373 mother, in four cases with another adult female.

374 Some juveniles switched directly among roosts. Such events took only seconds to minutes  
375 (see table xx). During other events stopover sites were used and several attempts of mothers  
376 re-associating with their young were necessary before both arrived at the new roost. Such  
377 unsuccessful tandem flights underline that the offspring was actively flying and not carried by  
378 the mother.

379 In both years significantly more mother-pup dyad have been observed switching roosts  
380 communally than expected by chance (Mantel tests, 9999 replicates; 2016:  $r = 0.88$ ,  $p <$   
381  $0.001$ ; 2017:  $r = 0.21$ ,  $p < 0.01$ ).

382

383 3.2.2 Associations during foraging bouts

384 In total we detected 42 foraging bouts of juveniles, which matched our definition above,  
385 conducted by 13 individuals (2016: four juveniles, eight bouts; 2017: nine juveniles, 34  
386 bouts). Foraging bouts lasted on average 1:14:53 h with a standard deviation of 36:19 min.  
387 During 6 of these 42 foraging bouts (14 %, n = 7 individual juveniles, all 2017) we detected in  
388 total 28 short meetings, which lasted between 1 and 30 seconds (average: 7.4 s +/- 8.6). Two  
389 of these meetings occurred within less than 90 s after two co-roosting individuals left a roost;  
390 however, no further meetings have been documented during these foraging bouts. All  
391 remaining meetings originated at least several minutes after emergence from the roost. Eight  
392 times the meeting partner was another juvenile and twice an adult female. Only in one case  
393 the meeting partner was the identified mother. Accordingly, meetings among mother-pup  
394 dyads have not been observed more often than expected by chance (Mantel tests, 9999  
395 replicates,  $r = 0.08$ ,  $p > 0.05$ ).

396 In 13 out of the 42 foraging bouts of juveniles (2016: n = two individuals; 2017: n = seven  
397 individuals) the identified mother was co-roosting before both started a bout. In all 13 cases  
398 the mother started its foraging bout considerably earlier than the juvenile (between 4:31 min  
399 and 1:26:02 h, average: 36:45 min (+/- 24:57)).

400

## 401 **Discussion**

402 The study of information transfer in free-ranging bats is particularly challenging due to their  
403 small body size and their elusive, nocturnal life. We tracked bats using novel, miniaturized  
404 proximity sensors and demonstrated that juveniles use social information of group members  
405 and for finding roosts mothers seem to intentionally guide their young. However, during  
406 foraging mothers did not guide their offspring, but meetings with other colony members may  
407 reflect local enhancement at feeding grounds.

408 To the best of our knowledge our study shows for the first time that recruitment to a new roost  
409 starts already at the occupied roost. Furthermore, the repeated commuting flights we observed



410 in at least two cases until the juvenile arrives at the target roost represents anecdotal evidence  
411 that at least in some cases deliberate, evolved signals rather than inadvertent social cues are  
412 used. The existence of evolved signals and the strong bias towards information transfer  
413 among mother-pup pairs suggests that the observed behaviour is best explained by kin  
414 selection. Some studies have reported on the use of social information in bats for finding  
415 suitable roosts, however, studies are scarce and the mechanisms are in parts poorly  
416 understood, in particular when it comes to naïve juveniles. Studies on a range of  
417 vespertilionid species including the focus species *N. noctula* have shown that conspecific calls  
418 enhance roost finding efficiency in captive experiments as well as in the wild (Ruczyński,  
419 Kalko & Siemers 2009; Schöner, Schöner & Kerth 2010; Furmankiewicz *et al.* 2011). These  
420 studies demonstrate that bats may eavesdrop on vocalizations to localize an occupied roost  
421 once within hearing distance. Since playbacks from varying contexts have been used we  
422 conclude that the studied bats relied on inadvertently broadcasted public information. On the  
423 contrary, Spix's disk winged bats deliberately produce signals to facilitate group cohesion, by  
424 a remarkable call-and-response system among flying bats in search of a roost and bats  
425 occupying a roost (Chaverri, Gillam & Vonhof 2010; Chaverri, Gillam & Kunz 2012). A  
426 common theme of all abovementioned studies is that the mechanism of recruitment of  
427 conspecifics is best explained by local enhancement, i.e. the social information is acquired at  
428 the new roost, when searching bats are in hearing distance. Kerth and Reckardt (2003) were  
429 first to present experimental evidence for information transfer about roosts in bats. The  
430 authors presumed that naïve Bechstein's bats are recruited to a novel roost already at the  
431 dayroost by experienced conspecifics, however, they could not unequivocally exclude local  
432 enhancement at the target roost. Our study finally demonstrates that this inferred mechanism  
433 does exist in roost-switching bats.

434 We classify the advertent information transfer from mothers to their young as a form of  
435 maternal care which has to the best of our knowledge not been observed in free-ranging bats,

436 so far. Mammalian offspring is usually strongly dependent on maternal care for food,  
437 protection and warmth (Balshine 2012) and maternal investment in young is also wide-spread  
438 in bats (Smith, Lacey & Hayes 2017). Besides weaning maternal care has been demonstrated  
439 in form of post-weaning food provisioning (Wilkinson 1990; Geipel *et al.* 2013), grooming  
440 (Kleiman 1969; Wilkinson 1986; Kozhurina 1993) or pup guarding (Bohn, Moss &  
441 Wilkinson 2009). Carrying young in flight is also commonly observed and Jones (2000)  
442 summarizes some reports where young are possibly carried to temporary roosts or feeding  
443 grounds. However, this is the first study to document maternal guidance to roosts, which has  
444 been hypothesized as a plausible explanation for young to reach swarming and hibernation  
445 sites, but could not be confirmed, possibly due to the lack of appropriate tracking technology  
446 (Sachteleben 1991; Burns & Broders 2015; Stumpf *et al.* 2017).

447 Previous work on bats indicated that roosts may act as information centres where bats may  
448 obtain information on food by inadvertent cues (Ratcliffe & ter Hofstede 2005; O'Mara,  
449 Dechmann & Page 2014). A considerable part of the diet of Greater noctule bats consists of  
450 insects, which fly in swarms and often over water (Gloor, Stutz & Ziswiler 1995). Such rich  
451 and patchy, but ephemeral foraging sites are required for the establishment of information  
452 centres (Ward & Zahavi 1973) and juveniles in particular might benefit from rich food  
453 patches when collecting experience on where and how to forage. However, we did not  
454 observe recruitment at the roost to feeding grounds in young noctules, which complies with  
455 most foregoing studies that showed that 'ICH' operates in colonial roosts, but is rarely  
456 demonstrated in breeding colonies (summarized by Evans, Votier and Dall (2016)). Our  
457 observation that juveniles start foraging bouts considerably later than their mothers suggests  
458 that juvenile noctules conduct opportunistic, explorative foraging flights. Rare and short  
459 contacts to tagged colony members other than the mother during foraging bouts suggest that  
460 local enhancement by eavesdropping on conspecifics while hunting may play a role as it has  
461 been shown for several insectivorous bat species (Gillam 2007; Dechmann *et al.* 2009; Cvikel

462 *et al.* 2015). However, our data cannot unequivocally prove this theory since the exact context  
463 of the meetings remains unknown.

464 Our observations raise the following question: Why is social information transfer among  
465 mothers and their offspring context dependent? One possible explanation is that group  
466 cohesion is crucial for energy-saving social warming and prolonged lactation periods in bats  
467 require mothers to stay in contact with their young for 3 weeks to 2 months depending on the  
468 species (reviewed by Kerth (2008)). Extended weaning, which was observed in captive  
469 noctules for up to 2 months (Kleiman 1969), and the broad spectrum of insects they feed on  
470 (Gloor, Stutz & Ziswiler 1995) may in turn enable juveniles to forage opportunistically and –  
471 if available – make use of social information by local enhancement. In general, suitable roosts  
472 of high quality may be harder to find opportunistically than insect prey and information on  
473 roosts is likely to accumulate in adults, in particular in philopatric females. This should favour  
474 information transfer on roosts since failing to relocate at an occupied roost might be more  
475 costly than low foraging success, which might subsequently be balanced by extended  
476 weaning. Adverse climatic conditions may have detrimental effects on single bats (Lindström  
477 1999) and might therefore be a strong driver of the evolution of the observed guidance  
478 behaviour, since local enhancement by vocalization at the roost (Furmankiewicz *et al.* 2011)  
479 might not be functional for long-distance localization of roosting partners.

480

## 481 **Conclusions**

482 Bats are facing ideal prerequisites for social information transfer, since they are long-lived  
483 and the vast majority of species is living in group. Regarding information use in offspring  
484 Wilkinson and Boughman (1999) speculated already 20 years ago that young bats almost  
485 certainly follow adults in situations other than foraging. However, this is also how long it took  
486 to unequivocally track mother-pup pairs switching among roosting sites. Our study shows that

487 the current revolution in tracking technology provides powerful tools to investigate  
488 behavioural ecology and sociobiology in free-ranging small bodied animals such as bats.

489

### 490 **Authors' contributions**

491 SR and FM conceived the ideas and designed the sampling scheme; MH, ND, AK, BC and  
492 RK developed and tested all tracking equipment. SR, LG, FM and HW collected the data; SR  
493 and LG analysed the data; SR and FM led the writing of the manuscript. All authors  
494 contributed critically to the drafts and gave final approval for publication.

495

### 496 **Acknowledgements**

497 We thank I. Waurick, S. Hayden and E. Jäger for support during molecular lab work. We are  
498 grateful to T. Teige for his help and his valuable expertise during field work. All necessary  
499 permits have been obtained from SenStadtUm (I E 222/OA-AS/G\_1203) and LaGeSo (I C  
500 113-G0008/16).

501

### 502 **Data accessibility**

503 Data will be deposited on GFBio and made available upon acceptance.

504

### 505 **Literature**

506 Amelon, S.K., Dalton, D.C., Millspaugh, J.J. & Wolf, S.A. (2009) Radiotelemetry techniques  
507 and analysis. *Ecological and behavioral methods for the study of bats* (eds T.H. Kunz  
508 & S. Parsons), pp. 57-77. The John Hopkins University Press, Baltimore, Maryland.  
509 Balshine, S. (2012) Patterns of parental care in vertebrates. *The evolution of parental care*  
510 (eds N.J. Royle & P.T. Smiseth), pp. 376. Oxford University Press Oxford

- 511 Bohn, K.M., Moss, C.F. & Wilkinson, G.S. (2009) Pup guarding by greater spear-nosed bats.  
512 *Behavioral Ecology and Sociobiology*, **63**, 1693-1703.
- 513 Boston, E., Montgomery, I. & Prodöhl, P.A. (2009) Development and characterization of 11  
514 polymorphic compound tetranucleotide microsatellite loci for the Leisler's bat,  
515 *Nyctalus leisleri* (Vespertilionidae, Chiroptera). *Conservation Genetics*, **10**, 1501.
- 516 Brunet-Rossinni, A.K. & Wilkinson, G.S. (2009) Methods for age estimation and the study of  
517 senescence in bats. *Ecological and behavioral methods for the study of bats* (eds T.H.  
518 Kunz & S. Parsons), pp. 315-325. Johns Hopkins University Press, Baltimore.
- 519 Burns, L.E. & Broders, H.G. (2015) Who swarms with whom? Group dynamics of *Myotis*  
520 bats during autumn swarming. *Behavioral Ecology*, **26**, 866-876.
- 521 Cassens, B., Ripperger, S., Hierold, M., Mayer, F. & Kapitza, R. (2017) Automated  
522 Encounter Detection for Animal-Borne Sensor Nodes. *Proceedings of the 2017*  
523 *International Conference on Embedded Wireless Systems and Networks*, pp. 120-131.  
524 Junction Publishing.
- 525 Castella, V. & Ruedi, M. (2000) Characterization of highly variable microsatellite loci in the  
526 bat *Myotis myotis* (Chiroptera: Vespertilionidae). *Molecular Ecology*, **9**, 1000-1002.
- 527 Chaverri, G., Gillam, E.H. & Kunz, T.H. (2012) A call-and-response system facilitates group  
528 cohesion among disc-winged bats. *Behavioral Ecology*, **24**, 481-487.
- 529 Chaverri, G., Gillam, E.H. & Vonhof, M.J. (2010) Social calls used by a leaf-roosting bat to  
530 signal location. *Biology Letters*, **6**, 441-444.
- 531 Cvikel, N., Egert Berg, K., Levin, E., Hurme, E., Borissov, I., Boonman, A., Amichai, E. &  
532 Yovel, Y. (2015) Bats Aggregate to Improve Prey Search but Might Be Impaired  
533 when Their Density Becomes Too High. *Current Biology*, **25**, 206-211.
- 534 Dall, S.R., Giraldeau, L.-A., Olsson, O., McNamara, J.M. & Stephens, D.W. (2005)  
535 Information and its use by animals in evolutionary ecology. *Trends in Ecology &*  
536 *Evolution*, **20**, 187-193.

- 537 Dechmann, D.K., Heucke, S.L., Giuggioli, L., Safi, K., Voigt, C.C. & Wikelski, M. (2009)  
538 Experimental evidence for group hunting via eavesdropping in echolocating bats.  
539 *Proceedings of the Royal Society of London B: Biological Sciences*, rspb. 2009.0473.
- 540 Dray, S. & Dufour, A.-B. (2007) The ade4 package: implementing the duality diagram for  
541 ecologists. *Journal of statistical software*, **22**, 1-20.
- 542 Duda, N., Weigel, R. & Koelpin, A. (2018) Enhanced mobile node design for small size  
543 animal borne wireless sensor nodes with encounter detection and localization.  
544 *Microwave Conference (GeMiC), 2018 11th German*, pp. 123-126. IEEE.
- 545 Eckenweber, M. & Knörnschild, M. (2013) Social influences on territorial signaling in male  
546 greater sac-winged bats. *Behavioral Ecology and Sociobiology*, **67**, 639-648.
- 547 Evans, J.C., Votier, S.C. & Dall, S.R. (2016) Information use in colonial living. *Biological*  
548 *reviews*, **91**, 658-672.
- 549 Furmankiewicz, J., Ruczyński, I., Urban, R. & Jones, G. (2011) Social calls provide  
550 tree-dwelling bats with information about the location of conspecifics at roosts.  
551 *Ethology*, **117**, 480-489.
- 552 Galef Jr, B.G. & Giraldeau, L.-A. (2001) Social influences on foraging in vertebrates: causal  
553 mechanisms and adaptive functions. *Animal Behaviour*, **61**, 3-15.
- 554 Geipel, I., Kalko, E.K.V., Wallmeyer, K. & Knörnschild, M. (2013) Postweaning maternal  
555 food provisioning in a bat with a complex hunting strategy. *Animal Behaviour*, **85**,  
556 1435-1441.
- 557 Gillam, E. (2007) Eavesdropping by bats on the feeding buzzes of conspecifics. *Canadian*  
558 *journal of zoology*, **85**, 795-801.
- 559 Gloor, S., Stutz, H.-P.B. & Ziswiler, V. (1995) Nutritional habits of the noctule bat *Nyctalus*  
560 *noctula* (Schreber, 1774) in Switzerland. *Myotis*, **32**, 231-242.
- 561 Grünbaum, D. & Veit, R.R. (2003) Black-browed albatrosses foraging on Antarctic krill:  
562 density-dependence through local enhancement? *Ecology*, **84**, 3265-3275.

- 563 Heckel, G., Voigt, C.C., Mayer, F. & Von Helversen, O. (1999) Extra-harem paternity in the  
564 white-lined bat *Saccopteryx bilineata* (Emballonuridae). *Behaviour*, **136**, 1173-1185.
- 565 James, D. & DebRoy, S. (2012) RMySQL: R interface to the MySQL database (2011). R  
566 package version 0.8-0.
- 567 Jan, C., Dawson, D.A., Altringham, J.D., Burke, T. & Butlin, R.K. (2012) Development of  
568 conserved microsatellite markers of high cross-species utility in bat species  
569 (Vespertilionidae, Chiroptera, Mammalia). *Molecular Ecology Resources*, **12**, 532-  
570 548.
- 571 Jones, G. (2000) The ontogeny of behavior in bats: a functional perspective. *Ontogeny,*  
572 *functional ecology, and evolution of bats* (eds R. ADAMS & S. PEDERSEN), pp.  
573 362-392. Cambridge University Press, Cambridge.
- 574 Kalinowski, S.T., Taper, M.L. & Marshall, T.C. (2007) Revising how the computer program  
575 CERVUS accommodates genotyping error increases success in paternity assignment.  
576 *Molecular Ecology*, **16**, 1099-1106.
- 577 Kays, R., Crofoot, M.C., Jetz, W. & Wikelski, M. (2015) Terrestrial animal tracking as an eye  
578 on life and planet. *Science*, **348**, aaa2478.
- 579 Kerth, G. (2008) Causes and consequences of sociality in bats. *Bioscience*, **58**, 737-746.
- 580 Kerth, G. & Reckardt, K. (2003) Information transfer about roosts in female Bechstein's bats:  
581 an experimental field study. *Proceedings of the Royal Society of London, Series B:*  
582 *Biological Sciences*, **270**, 511-515.
- 583 Kleiman, D.G. (1969) Maternal care, growth rate, and development in the noctule (*Nyctalus*  
584 *noctula*), pipistrelle (*Pipistrellus pipistrellus*), and serotine (*Eptesicus serotinus*) bats.  
585 *Journal of Zoology*, **157**, 187-211.
- 586 Knörnschild, M., Nagy, M., Metz, M., Mayer, F. & von Helversen, O. (2010) Complex vocal  
587 imitation during ontogeny in a bat. *Biology Letters*, **6**, 156-159.

- 588 Kozhurina, E.I. (1993) Social Organization of a Maternity Group in the Noctule Bat, *Nyctalus*  
589 *noctula* (Chiroptera: Vespertilionidae). *Ethology*, **93**, 89-104.
- 590 Leadbeater, E. & Chittka, L. (2007) Social Learning in Insects — From Miniature Brains to  
591 Consensus Building. *Current Biology*, **17**, R703-R713.
- 592 Levin, I.I., Zonana, D.M., Burt, J.M. & Safran, R.J. (2015) Performance of Encounternet  
593 Tags: Field Tests of Miniaturized Proximity Loggers for Use on Small Birds. *PLoS*  
594 *ONE*, **10**, e0137242.
- 595 Lindström, J. (1999) Early development and fitness in birds and mammals. *Trends in Ecology*  
596 *& Evolution*, **14**, 343-348.
- 597 Lummaa, V. & Clutton-Brock, T. (2002) Early development, survival and reproduction in  
598 humans. *Trends in Ecology & Evolution*, **17**, 141-147.
- 599 Mayer, F., Schlötterer, C. & Tautz, D. (2000) Polymorphic microsatellite loci in vespertilionid  
600 bats isolated from the noctule bat *Nyctalus noctula*. *Molecular Ecology*, **9**, 2209-2212.
- 601 Miller, S., Dykes, D. & Polesky, H. (1988) A simple salting out procedure for extracting  
602 DNA from human nucleated cells. *Nucleic Acids Research*, **16**, 1215.
- 603 O'Mara, M.T., Wikelski, M. & Dechmann, D.K. (2014) 50 years of bat tracking: device  
604 attachment and future directions. *Methods in Ecology and Evolution*, **5**, 311-319.
- 605 O'Mara, M.T., Dechmann, D.K. & Page, R.A. (2014) Frugivorous bats evaluate the quality of  
606 social information when choosing novel foods. *Behavioral Ecology*, **25**, 1233-1239.
- 607 R Developing Core Team (2015) R: A language and environment for statistical computing. R  
608 Foundation for Statistical Computing, Vienna, Austria.
- 609 Ratcliffe, J.M. & ter Hofstede, H.M. (2005) Roosts as information centres: social learning of  
610 food preferences in bats. *Biology Letters*, **1**, 72-74.
- 611 Ripperger, S., Josic, D., Hierold, M., Koelpin, A., Weigel, R., Hartmann, M., Page, R. &  
612 Mayer, F. (2016) Automated proximity sensing in small vertebrates: design of



- 613 miniaturized sensor nodes and first field tests in bats. *Ecology and Evolution*, **6**, 2179-  
614 2189.
- 615 Ruczyński, I., Kalko, E.K. & Siemers, B.M. (2007) The sensory basis of roost finding in a  
616 forest bat, *Nyctalus noctula*. *Journal of Experimental Biology*, **210**, 3607-3615.
- 617 Ruczyński, I., Kalko, E.K. & Siemers, B.M. (2009) Calls in the forest: a comparative  
618 approach to how bats find tree cavities. *Ethology*, **115**, 167-177.
- 619 Rutz, C., Morrissey, M.B., Burns, Z.T., Burt, J., Otis, B., St Clair, J.J. & James, R. (2015)  
620 Calibrating animal-borne proximity loggers. *Methods in Ecology and Evolution*, **6**,  
621 656–667.
- 622 Sachteleben, J. (1991) Zum ‘Invasions’—Verhalten der Zwergfledermaus (*Pipistrellus*  
623 *pipistrellus*). *Nyctalus (NF)*, **4**, 51-66.
- 624 Schnitzler, H.-U., Moss, C.F. & Denzinger, A. (2003) From spatial orientation to food  
625 acquisition in echolocating bats. *Trends in Ecology & Evolution*, **18**, 386-394.
- 626 Schöner, C.R., Schöner, M.G. & Kerth, G. (2010) Similar is not the same: social calls of  
627 conspecifics are more effective in attracting wild bats to day roosts than those of other  
628 bat species. *Behavioral Ecology and Sociobiology*, **64**, 2053-2063.
- 629 Smith, J.E., Lacey, E.A. & Hayes, L.D. (2017) Sociality in Non-Primate Mammals.  
630 *Comparative social evolution* (eds D.R. Rubenstein & P. Abbot), pp. 284. Cambridge  
631 University Press, Cambridge, UK.
- 632 St Clair, J., Burns, Z., Bettaney, E., Morrissey, M., Burt, J., Otis, B., Ryder, B., Fleischer, R.,  
633 James, R. & Rutz, C. (2015) Experimental resource pulses influence social-network  
634 dynamics and the potential for information flow in tool-using crows. *Nature*  
635 *Communications*, **6**, 7197.
- 636 Stumpf, M., Meier, F., Grosche, L., Halczok, T.K., Van Schaik, J. & Kerth, G. (2017) How do  
637 young bats find suitable swarming and hibernation sites? Assessing the plausibility of

- 638 the maternal guidance hypothesis using genetic maternity assignment for two  
639 European bat species. *Acta Chiropterologica*, **19**, 319-327.
- 640 Templeton, C.N., Greene, E. & Davis, K. (2005) Allometry of alarm calls: black-capped  
641 chickadees encode information about predator size. *Science*, **308**, 1934-1937.
- 642 van Schaik, C., Graber, S., Schuppli, C. & Burkart, J. (2017) The Ecology of Social Learning  
643 in Animals and its Link with Intelligence. *The Spanish Journal of Psychology*, **19**,  
644 E99.
- 645 Ward, P. & Zahavi, A. (1973) The importance of certain assemblages of birds as  
646 “information-centres” for food-finding. *Ibis*, **115**, 517-534.
- 647 Wilkinson, G.S. (1986) Social grooming in the common vampire bat, *Desmodus rotundus*.  
648 *Animal Behaviour*, **34**, 1880-1889.
- 649 Wilkinson, G.S. (1990) Food sharing in vampire bats. *Scientific American*, **262**, 76-83.
- 650 Wilkinson, G.S. (1992) Information transfer at evening bat colonies. *Animal Behaviour*, **44**,  
651 501-518.
- 652 Wilkinson, G.S. (1995) Information transfer in bats. *Symposia of the Zoological Society of*  
653 *London*, pp. 345-360. London: The Society, 1960-1999.
- 654 Wilkinson, G.S. & Boughman, J.W. (1998) Social calls coordinate foraging in greater spear-  
655 nosed bats. *Animal Behaviour*, **55**, 337-350.
- 656 Wilkinson, G.S. & Boughman, J.W. (1999) Social influences on foraging in bats. *Mammalian*  
657 *social learning: Comparative and ecological perspectives* (eds H.O. Box & K.R.  
658 Gibson), pp. 188-204. Cambridge University Press, Cambridge, UK.
- 659
- 660

661 **Supporting information**

662 The following Supporting Information is available for this article online.

663 Table S1: Results from allele frequency calculations with CERVUS v. 3.0 (Kalinovski et al.

664 2007).

665 **Tables**

666 Table 1: Summary of joint roost switching events of pups and associated partners. Switching  
 667 durations were only determined when both roosts were known and equipped with base  
 668 stations, while NA represents unmonitored sites or uncertain switching mode.

| pupID | sex | partnerID | start time          | end time            | duration   | Switching |
|-------|-----|-----------|---------------------|---------------------|------------|-----------|
|       |     | (mother)  | [date-time]         | [date-time]         | [hh:mm:ss] | mode      |
| 9307  | f   | 9338 (m)  | 2016-07-21 02:59:35 | NA                  | NA         | NA        |
| 9311  | f   | 9330 (m)  | 2016-07-16 23:26:22 | 2016-07-17 01:15:06 | 01:48:44   | 3*        |
| 9311  | f   | 9330 (m)  | 2016-07-20 03:18:35 | 2016-07-20 03:19:31 | 00:00:56   | 1         |
| 9318  | f   | 9330 (m)  | 2016-07-16 23:26:33 | 2016-07-16 23:28:31 | 00:01:58   | 1*        |
| 9318  | f   | 9330 (m)  | 2016-07-20 04:14:25 | 2016-07-20 04:14:54 | 00:00:29   | 3         |
| 9319  | f   | 9327 (m)  | 2016-07-16 22:48:01 | NA                  | NA         | NA        |
| 9312  | f   | 9334 (m)  | 2016-07-17 01:29:14 | NA                  | NA         | 1         |
| 9323  | m   | 9340 (m)  | 2016-07-16 23:58:13 | 2016-07-17 01:37:06 | 01:38:53   | 2         |
| 9323  | m   | 9340 (m)  | 2016-07-19 02:05:26 | NA                  | NA         | 1         |
| 9325  | m   | 9336 (m)  | 2016-07-17 02:44:31 | 2016-07-17 03:55:19 | 01:10:48   | 2         |
| 9376  | f   | 9383      | 2017-07-20 04:23:43 | 2017-07-20 04:23:49 | 00:00:06   | 1         |
| 9376  | f   | 9383      | 2017-07-22 02:25:53 | NA                  | NA         | 1         |
| 9370  | f   | 9368 (m)  | 2017-07-20 04:35:41 | NA                  | NA         | 1         |
| 9373  | m   | 9412      | 2017-07-22 02:38:13 | 2017-07-22 02:38:39 | 00:00:26   | 1         |
| 9380  | m   | 9413      | 2017-07-20 04:17:52 | NA                  | NA         | 1         |
| 9391  | f   | 9385 (m)  | NA                  | 2017-07-22 02:22:25 | NA         | 1         |

669 Switching mode: 1 quick, direct switch among two roosts; 2 switch included a joint stopover  
 670 at an unknown site indicated by stable meetings; 3 roost switch after commuting flights by  
 671 mother; \* see Fig. 3 for a schematic representation of these events

672

673 **Figures**

674

675 Figure 1: Unpackaged proximity sensor (a) and tagged adult Greater noctule bat (*Nyctalus*  
676 *noctula*) ready for take-off (b).

677

678 Figure 2: Visual representation of foraging bouts and roost switches based on presence signals  
679 at bat boxes (base stations) and meeting data. (a) A foraging bout is characterized by an  
680 interrupt of the presence signals of an individual bat which are received by a base station at a  
681 specific roost. Usually, variation of the received signal strength indicator (RSSI) increases  
682 when a bat is leaving a roost compared to when it is roosting (notice the pronounced spike  
683 upon departure and return). (b) A roost switch among two monitored sites is displayed. The  
684 presence signals interrupt at base station two while the strong variation in RSSI indicates that  
685 the bat is flying. Presence signals are then received by base station 1. (c) A roost switch  
686 occurs among an unmonitored to a monitored site. Roosting at the unmonitored site is  
687 indicated by long-lasting stable meetings among three bat individuals. Meetings interrupt  
688 when a bat individual leaves the unmonitored site followed by signal beacons being received  
689 by the base station at the monitored site.

690

691 Figure 3: Schematic representation of a mother and its twins switching roosts: repeated  
692 commutes indicate intentional behaviour of the mother. (a) A mother and its twins jointly  
693 leave roost 1 and the mother successfully transfers to roost 2 with pup 1. The meeting to pup 2  
694 aborts and pup 2 is flying back to roost 1. (b) Pup 2 moves solitarily from roost 1 to an  
695 unknown location where it is joined by its mother after a few minutes. Both fly in company  
696 towards roost 2, but pup 2 flies back to roost 1 while a meeting starts among the mother and  
697 pup 1 at roost 2. (c) The mother joins pup 2 in an unknown location and they jointly switch to  
698 roost 1. They jointly leave roost 1, but only the mother arrives at roost 2 starting a meeting

699 with pup 1, while the pup 2 flies back to roost 1. (d) The mother joins pup 2 in an unknown  
700 location, around 00:50 am the meeting is interrupted for several minutes (possibly because at  
701 least one individual left), before the mother commutes twice between its two pups. Finally,  
702 around 01:15 am the mother successfully switches with pup 2 to roost 2 while a meeting is  
703 ongoing. The triad stays at roost 2 until shortly before 2 am.  
704

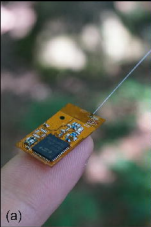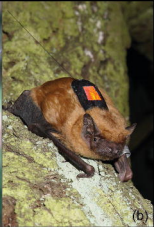

RSSI at base station

(a) foraging bout

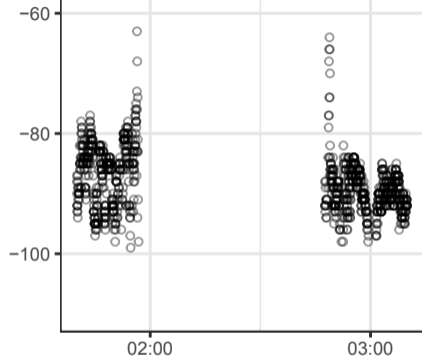

(b) roost switch among monitored sites

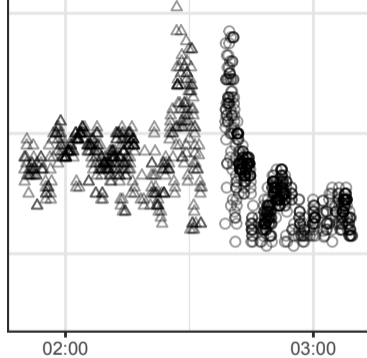

(c) roost switch from an unmonitored to a monitored site

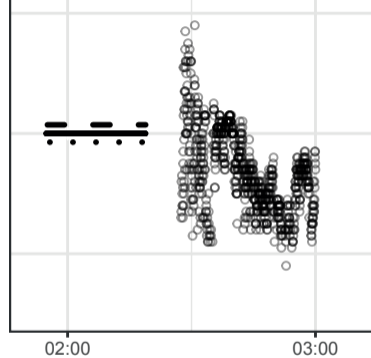

Local time Berlin

Legend: ○ Presence signal at base station 1  
△ Presence signal at base station 2  
— Presence at unknown roost indicated by stable meetings among three individuals



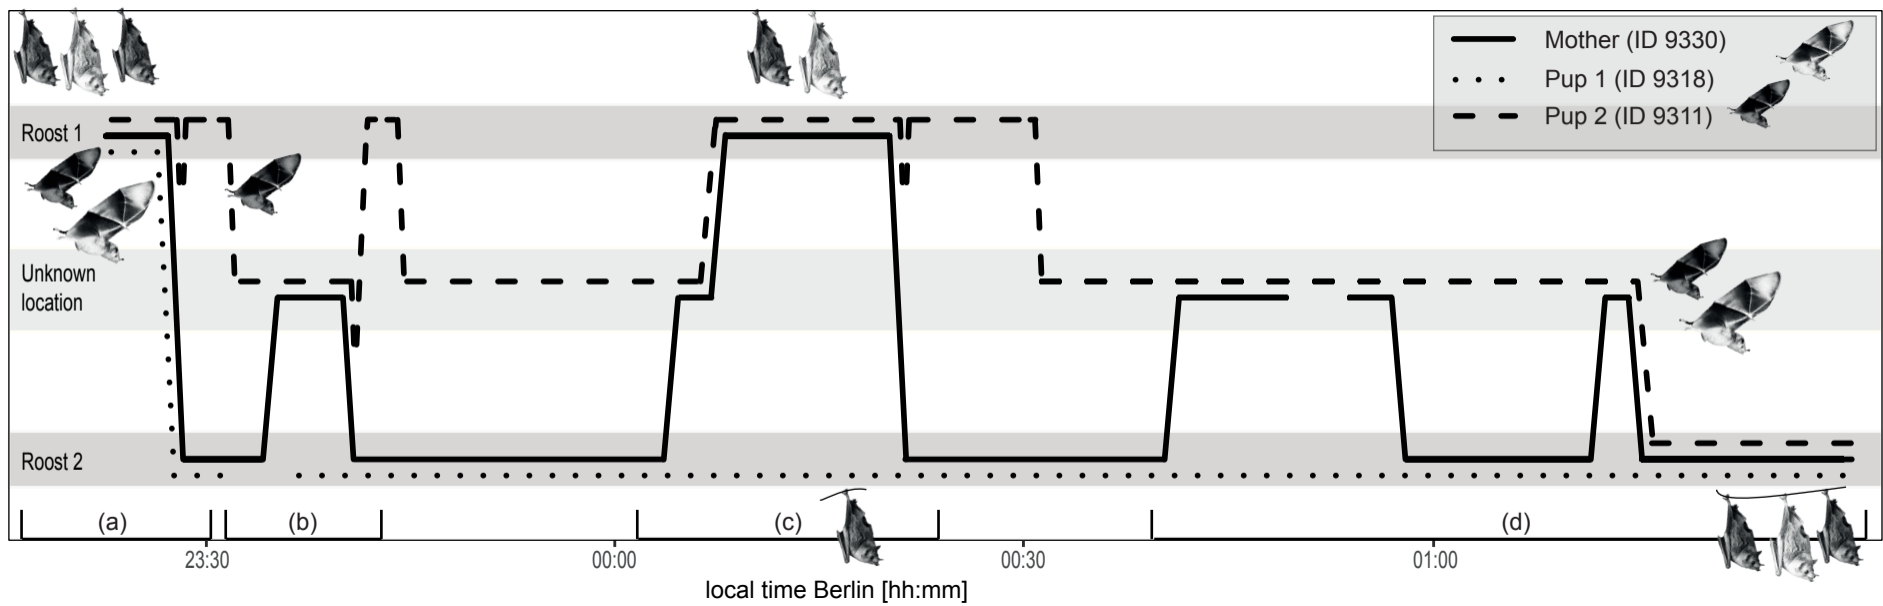

Source: https://www.biorxiv.org/content/10.1101/421974v1.full.pdf
